# Supplementary material
Source: MDPI journal article supplement (https://www.mdpi.com/2076-3417/10/21/7763)
Supplement: s1 [file s1]

**Table 1.** Summary table of methodology used to determine hydrolytic extracellular enzymes.

| Activity               | Substrate                                          | Incubation Time (days) | Observation of Positive Results                  |
|------------------------|----------------------------------------------------|------------------------|--------------------------------------------------|
| Proteolytic            | 1% sodium caseinate                                | 3                      | Clear halo around the colony growth              |
| Amylolytic             | 1% starch                                          | 3                      | <sup>1</sup> Halo around the colony growth after |
| Phosphate solubilising | 2.5% phosphate tricalcium                          | 3                      | Clear halo around the colony growth              |
| Lipolytic              | 1% trybutirin                                      | 5                      | Clear halo around the colony growth              |
| Pectinolytic           | 0.5% pectin                                        | 5                      | <sup>2</sup> Pink halo around the colony         |
| Hemicelulolytic        | 0.5% xylan                                         | 5                      | Clear halo around the colony growth              |
| Celullosolytic         | 0.5% microcrystalline cellulose + 0.005% nigrosine | 7–10                   | Clear halo around the colony growth              |
| Ammonifying            | 0.02% of asparagine                                | 15                     | <sup>3</sup> Formation of orange precipitate     |

<sup>1</sup>Previously 1-2 mL of iodine solution was added.

<sup>2</sup>Previously, a volume of 1-2 mL of 0.05% ruthenium solution was added and incubated 1 h at room temperature and washed with dH<sub>2</sub>O.

<sup>3</sup>Previously, 1 mL of Nessler reagent was added.

**Table 2.** Summary table of methodology used to determine oxidative extracellular enzymes.

| Activity           | Reagent Solution*                                                     | Positive Results      |
|--------------------|-----------------------------------------------------------------------|-----------------------|
| Tyrosinase         | Solution of 0.1 M de <i>p</i> -cresol diluted in ethanol              | Yellow-reddish        |
| Laccase            | Solution 0.1 M 1- naphthol diluted in ethanol                         | Blue-purple colouring |
| Peroxidase         | Solution of 0.5% of Pyrogallol and 0.5% H <sub>2</sub> O <sub>2</sub> | Brown colouring       |
| Polyphenol oxidase | Solution of 0.5% of Pyrogallol                                        | Brown colouring       |
